# Analysis of dietary vitamin C intake levels and the risk of hyperuricemia and gout based on cross-sectional studies and bi-directional Mendelian randomisation

1 Zi-Ning Peng<sup>1†</sup>, Xing-Qiang Wang<sup>2,3†</sup>, Qian Deng<sup>1</sup>, Wei-Tian Yan<sup>1</sup>, Wei-Qing Zhao<sup>4</sup>, Yong-Bin Pu<sup>2</sup>,  
2 Nian Liu<sup>1,3\*</sup>, Ling-Li Gu<sup>2\*</sup>, Jiang-Yun Peng<sup>2,3\*</sup>

3 <sup>1</sup>First school of clinical medicine, Yunnan University of Chinese Medicine, Kunming, Yunnan,  
4 650500, PR China

5 <sup>2</sup>Department of Rheumatology, The No.1 Affiliated Hospital of Yunnan University of Chinese  
6 Medicine, Kunming, Yunnan, 650021, PR China

7 <sup>3</sup>Yunnan Provincial Clinical Medicine Research Center of rheumatism in TCM, Yunnan provincial  
8 hospital of traditional Chinese medicine, Yunnan, 650021, PR China

9 <sup>4</sup>Department of Rheumatology and Immunology, The First People's Hospital of Yunnan Province  
10 and The Affiliated Hospital of Kunming University of Science and Technology, Kunming, Yunnan,  
11 650034, PR China

12  
13 † **Co-first Author**

14 Zi-Ning Peng

15 E-mail: [pzn2019@126.com](mailto:pzn2019@126.com)

16 Xing-Qiang Wang

17 E-mail: [ouyangfengyangguo@163.com](mailto:ouyangfengyangguo@163.com)

18 \* **Correspondence:**

19 Nian Liu

20 E-mail: [liunian8917@163.com](mailto:liunian8917@163.com)

21 Jiang-Yun Peng

22 E-mail: [pengjiangyun@126.com](mailto:pengjiangyun@126.com)

23 Ling-Li Gu

24 E-mail: [guyuxin82@126.com](mailto:guyuxin82@126.com)

25 **Preferred language:** British English

26 **Number of words:** 3,929

27 **Number of figures and tables:** 4 figures and 7 tables

28 **Running title:** Vitamin C and hyperuricemia/gout risk

29 **Keywords:** vitamin C, NHANES, Mendelian randomisation, hyperuricemia, gout, cross-sectional  
30 study

31 **Abstract**

32 **Background:** Vitamin C, a common antioxidant, may be useful for treating hyperuricemia and gout.  
33 The aim of this study was to investigate the risk association between dietary vitamin C intake and  
34 hyperuricemia/gout, and to test for causality using the bi-directional Mendelian randomisation  
35 method.

NOTE: This preprint reports new research that has not been certified by peer review and should not be used to guide clinical practice.

36 **Methods:** Cross-sectional studies were selected from the National Health and Nutrition  
37 Examination Survey from 2007–2018 to assess the association between dietary vitamin C intake  
38 and the risk of hyperuricemia/gout, according to multivariate logistic regression modelling. Bi-  
39 directional Mendelian randomisation studies were conducted using genetic data from large-scale  
40 genome-wide association surveys of supplemental vitamin C, pharmacological vitamin C, and  
41 ascorbic acid intake and hyperuricemia/gout; these aimed to infer causal relationships between  
42 vitamin C and hyperuricemia/gout. Inverse variance weighting was used as the primary method of  
43 Mendelian randomisation analysis. A series of sensitivity analyses were used to assess multiplicity.  
44 **Results:** The cross-sectional study included 17.52% and 82.48% patients with and without  
45 hyperuricemia, respectively, as well as 2.67% and 97.33% patients with and without gout,  
46 respectively. In the model correcting for all covariates, the association between vitamin C intake  
47 and the risk of hyperuricemia/gout was stable, and the risk of hyperuricemia was generally lower  
48 in patients who consumed >111.75 mg vitamin C than in other patients when comparing three  
49 models with different moderators. Restricted cubic spline scores indicated that vitamin C intake  
50 recommendations of 75–525 mg and 75–225 mg were effective for targeting hyperuricemia and  
51 gout, respectively. In inverse variance weighting in the Mendelian randomisation analysis, the  
52 amount of vitamin C absorbed was negatively associated with hyperuricemia (OR = 0.985, 95% CI  
53 = 0.973–0.997,  $p = 0.015$ ), and supplemental vitamin C was negatively associated with gout (OR =  
54 0.857, 95% CI = 0.797–0.921,  $p < 0.001$ ); sensitivity analysis yielded consistent results. Reverse  
55 Mendelian randomisation analysis showed that vitamin C had no reverse causal relationship with  
56 hyperuricemia and gout.  
57 **Conclusion:** We hypothesise that a dietary vitamin C intake of 75–525 mg or 75–225 mg may  
58 reduce the risk of hyperuricemia and gout, respectively. Further research with larger samples is  
59 required to confirm this.

## 60 **1 Introduction**

61 Gout has long been known as the “disease of kings” because of the disproportion rates of gout in  
62 royal families (1). In modern society, hyperuricemia (HUA) and other musculoskeletal diseases are  
63 common medical issues due to improvements in living standards (2). Cases of HUA and gout are  
64 increasing globally, particularly in higher-income, developed economies. Although current  
65 epidemiological data are incomplete, approximately one in five people are affected by increased  
66 uric acid levels and their effects; the prevalence of HUA and gout are approximately 20% and 2.6%,  
67 respectively (3, 4).  
68 Generally, gout begins as asymptomatic HUA, gradually developing into clinical symptoms  
69 accompanied by uric acid crystal deposits in the joint cavities, and finally advancing to a diagnosis  
70 of gout. This continuous process produces a series of complications (5). Persistent HUA can easily  
71 trigger end-stage diseases, resulting in increased mortality. Therefore, controlling high uric acid  
72 levels is crucial in determining treatment opportunities for gout. Epidemiological research shows  
73 that behavioural factors, especially dietary factors, affect uric acid metabolism. Although several  
74 anti-gout medications, such as febuxostat and colchicine, have been approved for use by the US  
75 Food and Drug Administration in recent years, these medications have significant adverse effects,  
76 including renal and hepatic failure and cardiotoxicity (6). Therefore, vitamin C (VC) has piqued the  
77 interest of researchers as a common antioxidant.  
78 VC, also known as ascorbic acid, plays a pleiotropic role in living organisms. In 1932, Hungarian

79 biologist Albert Szent-Györgyi first discovered VC and used it to regulate different biological  
80 processes (7). VC possesses bi-directional properties, acting as both an antioxidant and a pro-  
81 oxidant. Additionally, it exhibits properties that are related to the immune system. These  
82 characteristics of VC can aid in reducing HUA (8). Although dietary approaches appear to play an  
83 important role in preventing gout attacks or the onset of the disease, a comprehensive understanding  
84 of the interaction between uric acid and VC in the human body remains insufficient.

85 In HUA- or gout-related research, it is already very common to observe the protective properties of  
86 VC. For example, research shows that dietary and supplemental VC intake are negatively correlated  
87 with HUA risk (9). However, focusing solely on HUA is insufficient; therefore, our research also  
88 included participants with gout. In addition, the National Health and Nutrition Examination Survey  
89 (NHANES) 2007-2018 was used to add more data compared to previous research, and quartiles of  
90 dietary VC were observed. Supplemental VC was not considered as part of the overall dietary intake  
91 to avoid potential disruptions in our analysis; therefore, the effects of supplemental VC were  
92 excluded from our study.

93 Mendelian randomisation (MR) is an epidemiological method that uses genetic variation as an  
94 instrumental variable (IV) to represent exposure to a variable of interest. It is also used to investigate  
95 the effect of exposure on specific outcomes (10). In the present study, we investigate the underlying  
96 causal relationship between VC and gout/HUA. We performed MR analysis using genome-wide  
97 association study (GWAS) data. MR is the ideal tool for studying immune diseases because when  
98 exposed to external environmental factors, genetic variables can affect life expectancy. We used the  
99 bi-directional MR method to analyse and predict the causal effects of VC on gout and HUA, which  
100 helped mitigate bias from dietary questionnaires in the NHANES database, thereby enhancing the  
101 reliability of the results.

## 102 **2 Material and Methods**

103 This study consisted of two parts. In the first part, we conducted a study using data from a large  
104 sample of the NHANES to explore the association between VC intake and HUA/gout. Due to  
105 questionnaire bias in the NHANES database, we supplemented the second part with a bi-directional  
106 MR analysis utilising GWAS pooled statistics to reduce bias and avoid reverse causality and  
107 assessed the causal effects of VC intake on HUA and gout. The overall study design is shown in  
108 Figure 1.

### 109 **2.1 Cross-sectional Study**

#### 110 **2.1.1 Study Population**

111 NHANES examined a nationally representative sample of the civilian non-institutionalised  
112 population of the USA of all ages using a complex multistage probability design. We used the most  
113 recent NHANES database containing data from six cycles (2007–2018) (n = 59,842). Figure 1A  
114 shows the NHANES 2007–2018 sample selection flowchart. Following a home interview,  
115 participants were invited to complete additional questionnaires, undergo testing, and provide blood  
116 and other biospecimens in a mobile examination centre. The National Centre for Health Statistics  
117 Research Ethics Review Board approved NHANES, and all participants provided informed consent  
118 for the home interview and tests at the mobile examination centre. There were 28,227 participants  
119 aged 18 years or older who were eligible for the dietary questionnaire in this survey. Individuals

120 who did not provide a blood uric acid specimen ( $n = 1,455$ ), those who currently or previously had  
121 a tumour (self-reported) ( $n = 3,801$ ), and those taking uric acid-lowering medications (allopurinol,  
122 febuxostat, or probenecid) that interfered with the investigation ( $n = 291$ ) were excluded, and the  
123 remaining 22,680 individuals were enrolled in our next step of analysis.

### 124 **2.1.2 Dietary VC Intake**

125 Dietary VC intake was assessed using 24 h recall. Relying on the US Department of Agriculture  
126 Food and Nutritional Database (2007–2018) to determine the nutrient composition, supplied energy,  
127 and other components of diet and fluids, all participants underwent two 24 h recalls. The interviews  
128 included all types of food and fluids consumed. Thereafter, we analysed the average VC intake,  
129 including VC from all meals consumed by the participants, while excluding VC from supplements.

### 130 **2.1.3 HUA and Gout Diagnosis**

131 Serum concentrations of uric acid were measured using the Beckman UniCel® DxC 800 Synchron  
132 or Beckman Synchron LX20 (Beckman Coulter, Inc., Brea, CA, United States) after the uric acid  
133 was oxidised by uricase to form allantoin and  $H_2O_2$ . HUA was diagnosed when uric acid levels  
134 were  $\geq 420 \mu\text{mol/l}$  (7 mg/dL) in men and  $\geq 360 \mu\text{mol/l}$  (6 mg/dL) in women (11). Gout flares were  
135 defined by self-assessment in a questionnaire.

### 136 **2.1.4 Covariates**

137 Demographic characteristics included age, sex, race (Hispanic American, non-Hispanic white, non-  
138 Hispanic black, and other races), marital status (married, widowed, divorced, and unmarried), and  
139 education level (less than high school, high school graduate, and equal to college and above). Other  
140 covariates included smoking status (never, ex-smoker, and current persistent smoker), alcohol use  
141 (defined as at least one drink per month in the last year), poverty level, body mass index, and waist  
142 circumference. History of cardiovascular disease, hypertension, hyperlipidaemia, kidney stones,  
143 and diabetes mellitus were defined as self-reported medical diagnoses. Glomerular filtration rate  
144 was used to assess renal function, which was calculated using the CKD-EPI creatinine equation  
145 (12). Blood specimens were processed, stored, and shipped to their respective laboratories for  
146 analysis, including creatinine, glucose, cholesterol, triglyceride, direct cholesterol, and uric acid  
147 analysis.

### 148 **2.1.5 Statistical Analysis**

149 R version 4.2.2 was used for all analyses. Counts and proportions were used for categorical  
150 variables, whereas means and standard deviations were used for continuous data, and sampling  
151 weights were considered for all analyses. For two-tailed tests,  $p < 0.05$  was considered statistically  
152 significant. Based on VC intake quartiles, subjects were categorised into Q1 (0–29.1 mg), Q2 (29.1–  
153 61.0 mg), Q3 (61.0–111.75 mg), and Q4 ( $>111.75$  mg), and descriptive statistics were used to  
154 analyse the characteristics of the participants. Categorical variables were compared using the Chi-  
155 square test, and continuous variables were compared using ANOVAs or the Kruskal–Wallis H test.  
156 In this study, three models were produced: Model 1 included all variables, Model 2 corrected for  
157 some demographically relevant variables, and Model 3 corrected for all covariates. Logistic  
158 regression models and restricted cubic spline analyses were carried out to assess the correlation  
159 between dietary VC intake with the risk of developing gout and HUA.

## 160 **2.2 Bi-directional MR Study**

## 161 **2.2.1 Study Design**

162 The overall design of the MR study is shown in Figure 1B. To obtain valid causal effect estimates,  
163 IVs in the forward MR model need to meet the following three conditional assumptions: 1) genetic  
164 variations are significantly associated with VC intake levels; 2) genetic variations are not associated  
165 with other confounders; and 3) they affect gout or HUA only through the VC intake levels. Inverse  
166 MR model IVs need to meet the following three conditional assumptions: 1) genetic variations are  
167 significantly associated with gout or HUA; 2) genetic variations are not associated with other  
168 confounders; and 3) they affect VC intake levels only through gout or HUA.

## 169 **2.2.2 Data Sources and Genetic Tools**

170 Genetic tools were mainly derived from the latest GWAS meta-analysis, i.e. GWAS summary data  
171 (13). GWAS is a genome-wide test of polymorphic genetic variants (markers) in multiple  
172 individuals, enabling researchers to obtain genotypes for statistical analysis at the population level.  
173 We used GWAS to identify sequence variants, known as single nucleotide polymorphisms (SNPs),  
174 present on a genome-wide scale in humans. From this, we screened for SNPs associated with HUA,  
175 gout, and VC intake (14). HUA and gout data were obtained from the EBI database in the GWAS  
176 database, and VC data were obtained from the UKB database. Due to the lack of GWAS data on  
177 dietary VC, for the sake of completeness, we used all VC-related data from the UKB database for  
178 MR analysis, including data on “supplements: vitamin C”, “medication: vitamin C” and “vitamin  
179 C absorbed”. The specific data examined in this study are shown in Supplementary Table 1.

## 180 **2.2.3 Statistical Analysis**

181 MR analysis was mainly performed using inverse variance weighting (IVW)-random effects and  
182 IVW-fixed effects models. All statistical analyses were performed using “two sample MR” in R  
183 software. In addition, weighted median and MR-Egger regression were applied to supplement the  
184 analyses. Heterogeneity and pleiotropy among the selected SNPs were assessed using Cochrane Q-  
185 analysis and MR-Egger intercepts. Leave-one-out analysis was performed to test whether the  
186 estimates were driven by individual SNPs. Statistical power and F-statistic computational  
187 measurements ensured sufficient statistical efficacy to avoid weak IV bias. Power calculation was  
188 performed using the online tool mRnd<sup>1</sup> and the IV was deleted when the IV strength measure F-  
189 statistic was <10 to minimise the chance of MR analysis bias. Finally, reverse MR was applied to  
190 test for the presence of reverse causal links.

## 191 **3 Results**

### 192 **3.1 Cross-sectional Study**

#### 193 **3.1.1 Basic Characteristics of Study Participants**

194 Tables 1 and 2 summarise the overall characteristics of the study participants, that is, whether they  
195 had HUA and gout, respectively. Among the participants, 17.52% had HUA and 82.48% did not  
196 have HUA, whereas 2.67% had gout and 97.33% did not have gout. Separate analyses were  
197 performed according to sex, race, marital status, education, alcohol consumption, smoking status,  
198 hypertension, hyperlipidaemia, and diabetes, in relation to the presence of HUA or gout. Table 1

---

<sup>1</sup><https://shiny.cnsgenomics.com/mRnd/>

199 shows that, with the exception of alcohol consumption ( $p = 0.8$ ) and poverty level ( $p = 0.2$ ), all  
200 other variables exhibit statistically significant differences ( $p < 0.001$ ) between individuals with  
201 HUA and those with kidney stones ( $p = 0.006$ ). Table 2 shows that, in addition to education level  
202 ( $p = 0.4$ ), poverty level ( $p = 0.4$ ), and cholesterol ( $p = 0.6$ ), race ( $p = 0.014$ ), alcohol consumption  
203 ( $p = 0.006$ ), and VC ( $p = 0.003$ ) showed statistical significance with regard to having gout.  
204 Furthermore, the other covariates showed statistically significant differences with regard to having  
205 gout ( $p < 0.001$ ). The overall basic characteristics indicated that the prevalence of HUA and gout  
206 was higher in men than in women, and that patients with HUA and gout had lower VC intake than  
207 patients without these diseases.

### 208 **3.1.2 Relationship Between HUA/Gout and VC Intake Level**

209 Table 3 demonstrates the relationship between HUA/gout and VC intake level quartile. Logistic  
210 regression showed that Model 1, which did not correct for any variables, had the weakest correlation  
211 between VC intake level and the risk of HUA/gout. Model 2 increased the association between VC  
212 intake and the risk of HUA/gout; it controlled for age, sex, race, marital status, education, alcohol  
213 consumption, and smoking-related demographic variables. Model 3 corrected all covariates. After  
214 correction, the correlation between VC intake and the risk of HUA and gout in Model 3 was stable.  
215 Additionally, in these three models, VC intake and the risk of HUA in Q4 were generally lower  
216 than in Q1–3. After correcting for covariates, the protective effects of VC became increasingly  
217 evident from Model 1 to Model 3.

### 218 **3.1.3 Dose–response Relationship Between HUA/Gout and VC Intake**

219 After completely adjusting for confounding factors and correcting for all covariates, restricted cubic  
220 spline analysis was performed for HUA/gout and VC intake, respectively. This showed that VC  
221 intake had a non-linear relationship with both HUA ( $p < 0.0001$ ) and gout ( $p = 0.001$ ) in participants  
222 affected by either (Figure 2). Among these participants, a VC intake of 75–525 mg and 75–225 mg  
223 can effectively target HUA and gout, respectively.

## 224 **3.2 Bi-directional MR Study**

### 225 **3.2.1 MR Analysis Using IVs Based on GWAS**

226 SNPs were selected according to the following criteria: SNPs related to confounding factors  
227 between VC and HUA were excluded (e.g. those related to haemolysis, diabetes, cholesterol,  
228 lymphoma, chemotherapy, alcohol, metabolic syndromes, metabolism, and gout); SNPs related to  
229 confounding factors between VC and gout were excluded (e.g. those related to diabetes, cholesterol,  
230 alcohol, metabolic syndromes, metabolism, uric acid levels, HUA, and hypertension); SNPs related  
231 to the results; and SNPs that were not present in the results. For MR analysis, we selected all SNPs  
232 with critical values of  $p < 1 \times 10^{-5}$  related to HUA/gout–VC absorbates; the remaining selection ( $p$   
233  $< 1 \times 10^{-6}$ ) was used as an IV to increase the number of available SNPs and to facilitate subsequent  
234 sensitivity analyses.

235 We assessed the causal relationship between VC and HUA/gout based on different IVs (Table 4).  
236 The MR results show a causal relationship between VC absorbates and HUA; the MR IVW results  
237 show a negative correlation between VC absorbates and HUA (OR = 0.985, 95% CI = 0.973–0.997,  
238  $p = 0.015$ ). The results of all three other methods, MR-Egger, weighted median, and weighted mode,  
239 were statistically significant ( $p < 0.05$ ), consistent with the IVW results. Figure 3A shows a

240 scatterplot of the correlation between SNPs and HUA, as well as between SNPs and VC absorbates.  
241 Figure 3B shows a forest plot for each SNP in VC absorbate–HUA estimation, suggesting the  
242 magnitude of the MR effects of VC on HUA. As shown in Table 4, no statistically significant  
243 relationship was observed between supplemental VC or pharmacological VC and HUA in this MR  
244 analysis.

245 In addition, the MR IVW analysis results show a causal relationship between supplemental VC and  
246 gout (OR = 0.857, 95% CI = 0.797–0.921,  $p < 0.001$ ), supported by the weighted median method  
247 ( $p < 0.05$ ); correlation scatter plots and forest plots indicate the magnitude of the MR effect of VC  
248 on gout, as shown in Figure 4A and B. However, there was no statistically significant relationship  
249 between supplemental VC absorbates or pharmacological VC and gout in the MR analysis, as  
250 shown in Table 4.

### 251 **3.2.2 MR Sensitivity Analysis**

252 We estimated the stability of the MR results using sensitivity analysis, as shown in Table 5. In the  
253 analysis of VC absorbates versus HUA, Cochran’s Q test showed that there was slight heterogeneity  
254 in the MR-Egger analysis ( $p = 0.049$ ). The MR-Egger intercept test indicated that the MR analyses  
255 were not affected by horizontal pleiotropy ( $p > 0.05$ ). Leave-one-out sensitivity analysis confirmed  
256 the robustness of the MR results, and the absence of major SNPs (Figure 3C) greatly affected the  
257 results when eliminated. In addition, for the analysis of supplemental VC versus gout, Cochran’s Q  
258 test showed no heterogeneity in the MR-Egger analysis ( $p > 0.05$ ), and the results of the MR-Egger  
259 intercept test indicated that the MR analysis was not affected by horizontal pleiotropy ( $p > 0.05$ ).  
260 Leave-one-out sensitivity analysis showed no major SNPs that would greatly affect the results when  
261 eliminated, confirming the robustness of the MR results, as shown in Figure 4C.

### 262 **3.2.3 Reverse MR Analysis of the Causal Relationship Between VC and HUA/Gout**

263 We performed reverse MR analysis to estimate whether VC would affect HUA/gout using SNPs  
264 with critical values of  $p < 5 \times 10^{-8}$  as IVs. The reverse MR results are shown in Table 6. The results  
265 show that there is no reverse causal relationship between absorbed VC and HUA ( $p > 0.05$  for all  
266 five MR methods). Additionally, there was no reverse causal relationship between supplemental  
267 VC and gout ( $p > 0.05$  for all five MR methods).

268 Four MR methods exhibited no reverse causal relationship between supplemental VC and HUA ( $p >$   
269  $0.05$ ), whereas two methods showed no reverse causal relationship between pharmacological VC  
270 and HUA ( $p > 0.05$ ). Each MR method found no reverse causal relationship between any form of  
271 VC and gout ( $p > 0.05$ ).

### 272 **3.2.4 Reverse MR Sensitivity Analysis**

273 Cochran’s Q test showed no heterogeneity in the reverse MR analysis of absorbed VC and HUA  
274 ( $p > 0.05$ ), whereas there may be slight heterogeneity in the reverse MR analysis of supplemental  
275 VC and gout ( $p = 0.035$ ). In addition, the MR-Egger intercept test showed that the inverse MR  
276 analyses of absorbed VC versus HUA and supplemental VC versus gout were not affected by  
277 pleiotropy ( $p > 0.05$ ) (Table 7). Finally, leave-one-out sensitivity analysis confirmed the robustness  
278 of the reverse MR results (Supplementary Figures 1 and 2).

## 279 **4 Discussion**

280 There is evidence from prospective epidemiological studies that dietary factors are clinically  
281 associated risk factors for HUA and gout, including evidence for the protective effects of VC (15).

282 Some researchers considered that the urate-lowering effect of VC seemed to be more important  
283 than other functions. They further explored the potential mechanism of its urate-lowering properties  
284 and found that VC may reduce urate-induced inflammation by inhibiting the activation of the  
285 NLRP3 inflammasome (16). Additionally, *in vivo* studies showed that the VC transporter SVCT1  
286 acts as a urate importer and that SVCT1 damage can lower serum uric acid levels (17). However,  
287 studies that confirm the relationship between dietary VC intake, serum uric acid concentration, and  
288 gout are lacking.

289 In this study, we used data from the 2007–2018 NHANES cross-sectional survey and performed  
290 bi-directional MR analysis to accurately investigate the relationship between gout/HUA risks and  
291 dietary VC intake levels. The results show that gout/HUA and VC intake are negatively correlated  
292 in the cross-sectional survey. Restricted cubic spline analysis showed that daily dietary intakes of  
293 75–525 mg and 75–225 mg VC have protective effects on patients with HUA and gout, respectively.  
294 In the MR analysis, the causal association between absorbed VC and HUA, as well as supplemental  
295 VC and gout was consistent with the cross-sectional study.

296 Consistent with the present study, the dietary and nutritional factors associated with HUA in the  
297 Seventh Korean NHANES showed that dietary fibre intake and VC intake were negatively  
298 correlated with HUA (18). Another case-control study on the association between diet/obesity and  
299 gout in Taiwan showed that low VC intake increased the risk of gout and that increasing food  
300 sources rich in VC and dietary fibre can prevent gout (19). A meta-analysis of randomised  
301 controlled trials showed that a median supplementary VC dose of 8 mg/day for at least one week  
302 significantly decreased HUA (20). In contrast, current clinical dietary interventions that can reduce  
303 the frequency of gout flares (e.g. VC supplementation) can reduce serum uric acid levels and be  
304 used as adjuncts for urate-lowering treatment, a non-pharmacological approach to treat gout and  
305 HUA (21).

306 However, further research shows that in patients with gout, continuous VC treatment for eight  
307 weeks did not obviously lower uric acid levels, whether this constituted VC alone (500 mg/d) or  
308 VC combined with allopurinol. The results of this study may be biased due to a variety of factors  
309 such as dose, participants, and course of treatment (22). Overall, neither clinical observational  
310 studies nor randomised controlled trial meta-analyses can control for confounding factors and bias.  
311 Furthermore, most clinical studies are small-scale randomised controlled trials, which cannot  
312 control the accuracy of the results. Additionally, interventional studies of dietary VC intake levels  
313 and HUA/gout are still lacking, necessitating further research.

314 MR analysis can appropriately supplement deficiencies when using a large-sample GWAS database  
315 without fixed periods and can predict the permanent effects of VC intake. As the current database  
316 did not have data related to dietary VC intake, in the present study, it was important to use MR to  
317 explore the causal relationship between the risk of HUA/gout and supplemental VC,  
318 pharmacological VC, and ascorbic acid, respectively. In the MR results, the genetic susceptibility  
319 of absorbed VC with HUA and supplemental VC with gout is not coincidental; forward analysis  
320 and reverse MR testing also supported these negative correlations. The potential mechanisms of  
321 action underlying these effects of VC can include the following.

322 First, a gene mutation during the evolution of humans and guinea pigs means that endogenous VC  
323 cannot be produced. In addition, VC maintains homeostasis through anti-oxidation and cofactor  
324 functions. Blood lacks VC and easily undergoes oxidative stress and peroxide damage, but humans  
325 and guinea pigs need endogenous supplementation (23, 24). Second, the most important



326 physiological process in which VC is involved is anti-oxidation. According to research findings,  
327 another genetic mutation has been discovered in humans, leading to the elimination of the active  
328 uricase gene. This gene can counteract VC deficiency by increasing serum uric acid levels. High  
329 intracellular uric acid levels are prone to inducing oxidative stress in the body, and VC reduces the  
330 production of mitochondrial Reactive Oxygen Species, increases the level of antioxidant enzymes,  
331 and enhances the ability of the body to dissolve uric acid and promote uric acid efflux (25).  
332 However, the VC transporter protein modifies the function and activity of URAT1 in proximal renal  
333 tubular cells, thus increasing urate excretion in the body. As the body may obtain more fructose  
334 than other nutrients during VC intake, the role of VC; however, it will increase the level of uric  
335 acid, gout risk, and thus has obvious limitations. A side-by-side study evaluating dietary factors and  
336 biochemical indices of patients with gout and asymptomatic HUA confirmed that serum uric acid  
337 levels are influenced by dietary factors, and that VC intake in the healthy group was lower than in  
338 the disease group. This suggests that dietary intake of energy, protein, and fructose also affects gout  
339 and HUA (26). The lack of a significant correlation of supplements: vitamin C and medication:  
340 vitamin C with the risk of HUA, and vitamin C absorbed and medication: vitamin C with the risk  
341 of gout in the MR study could be attributed to these factors.

342 There are several distinct advantages to the present study. First, not only did this study utilise the  
343 NHANES database spanning the longest period, 2007–2018, for data completeness, but it also  
344 allowed for an investigation of the association between dietary VC intake and gout/HUA at the  
345 epidemiological level. Second, we introduced bi-directional MR analysis, which can address  
346 unavoidable influencing factors, such as reverse causality, measurement error, and residual  
347 confounders, which exist in ordinary epidemiological studies as well as NHANES data analysis;  
348 this adds practical significance to this study. One of the key aspects of this study is its inclusive  
349 examination of both gout and HUA, deviating from the conventional approach of focusing solely  
350 on a single factor, thus facilitating a more comprehensive investigation of the complexity of this  
351 type of immune disease. It facilitated the comparison between each disease to provide more  
352 informed advice based on patients in the clinic, as well as experimental direction for researchers to  
353 conduct further in vivo and in vitro studies. However, certain limitations exist, including the reliance  
354 solely on screening and analysis from the intrinsic database and the absence of extensive, prolonged  
355 multi-centre clinical research involving a larger sample size. Further research is required to validate  
356 the findings through long-term observational and interventional studies.

357 In conclusion, our study supports a causal relationship between dietary VC intake and the risk of  
358 HUA, with cross-sectional studies as well as a portion of our MR analyses suggesting a significant  
359 negative association. However, despite observational studies suggesting a negative association,  
360 other MR analysis did not yield significant results, suggesting that the results might still be  
361 influenced by uncontrollable confounding factors. Therefore, based on our findings, we hypothesise  
362 that daily dietary VC intake doses of 75–525 mg and 75–225 mg may potentially decrease the risk  
363 of HUA and gout, respectively; however, further studies with larger sample sizes are necessary to  
364 confirm these findings.

## 365 **5 Abbreviations**

366 GWAS, genome-wide association study; HUA, hyperuricemia; IV, instrumental variable; IVW,  
367 inverse variance weighting; MR, Mendelian randomisation; NHANES, National Health and  
368 Nutrition Examination Survey; SNP, single nucleotide polymorphism; VC, vitamin C

## 369 **6 Conflict of Interest**

370 The authors declare that the research was conducted in the absence of any commercial or financial  
371 relationships that could be construed as a potential conflict of interest.

## 372 **7 Author Contributions**

373 Z-NP and X-QW conceptualized the study, analyzed and interpreted the data, and revised and edited  
374 the manuscript. QD, W-TY, W-QZ, Y-BP, NL, J-YP and L-LG drafted the manuscript. NL, J-YP  
375 QD, W-TY and W-QZ provided advice for the project. NL, J-YP and L-LG provided administrative  
376 support. All authors read and approved the final manuscript.

## 377 **8 Funding**

378 This work was supported by the National Natural Science Foundation of China (81960863 and  
379 82160901), Construction Project of Yunnan Provincial Fund for Medical Research Center  
380 (202102AA310006), Construction Project of National Traditional Chinese Medicine Clinical  
381 Research Base (2018 No. 131), Construction Project for the Focal Branch of National Traditional  
382 Chinese Medicine (2023 No. 85), The Expert Workstation of Zhangxuan in Yunnan Province  
383 (202305AF150175), Funding of Yunnan Applied Basic Research Projects-Union Applied Basic  
384 Research Projects-Union Foundation (2019FF002[-082], 2019FF002[-031], 202101AZ070001-  
385 072 and 202101AZ070001-074), and Yunnan Provincial Traditional Chinese Medicine Discipline  
386 Reserve Talent Training Project (2021 No. 01).

## 387 **9 Acknowledgments**

388 The authors wish to acknowledge the authors and participants of the involved GWAS for providing  
389 summary statistics data.

## 390 **10 References**

- 391 1. Dalbeth N, Gosling AL, Gaffo A, Abhishek A. Gout. *Lancet* (2021) 397:1843-55. doi:  
392 10.1016/S0140-6736(21)00569-9
- 393 2. Hansildaar R, Vedder D, Baniaamam M, Tausche A-K, Gerritsen M, Nurmohamed MT.  
394 Cardiovascular risk in inflammatory arthritis: rheumatoid arthritis and gout. *Lancet Rheumatol*  
395 (2021) 3:e58-70. doi: 10.1016/S2665-9913(20)30221-6
- 396 3. Li L, Zhang Y, Zeng C. Update on the epidemiology, genetics, and therapeutic options of  
397 hyperuricemia. *Am J Transl Res* (2020) 12:3167-81.
- 398 4. Safiri S, Kolahi A-A, Cross M, Hill C, Smith E, Carson-Chahhoud K, et al. Prevalence, deaths,  
399 and disability-adjusted life years due to musculoskeletal disorders for 195 countries and territories  
400 1990-2017. *Arthritis Rheumatol* (2021) 73:702-14. doi: 10.1002/art.41571
- 401 5. Chowalloor PV, Keen HI. A systematic review of ultrasonography in gout and asymptomatic  
402 hyperuricaemia. *Ann Rheum Dis* (2013) 72:638-45. doi: 10.1136/annrheumdis-2012-202301
- 403 6. Karantas ID, Miliotou AN, Siafaka PI. An updated review for hyperuricemia and gout  
404 management; special focus on the available drug delivery systems and clinical trials. *Curr Med*  
405 *Chem* (2023) in press. doi: 10.2174/0929867331666230809143758
- 406 7. Grzybowski A, Pietrzak K. Albert Szent-Györgyi (1893-1986): the scientist who discovered  
407 vitamin C. *Clin Dermatol* (2013) 31:327-31. doi: 10.1016/j.clindermatol.2012.08.001
- 408 8. Brzezińska O, Styrzyński F, Makowska J, Walczak K. Role of vitamin C in prophylaxis and

- 409 treatment of gout—A literature review. *Nutrients* (2021) 13:701. doi: 10.3390/nu13020701
- 410 9. Sun Y, Sun J, Wang J, Gao T, Zhang H, Ma A. Association between vitamin C intake and risk  
411 of hyperuricemia in US adults. *Asia Pac J Clin Nutr* (2018) 27:1271-6. doi:  
412 10.6133/apjcn.201811\_27(6).0014
- 413 10. Smith GD, Hemani G. Mendelian randomization: genetic anchors for causal inference in  
414 epidemiological studies. *Hum Mol Genet* (2014) 23:R89-98. doi: 10.1093/hmg/ddu328
- 415 11. Lin Z, Chen H, Lan Q, Chen Y, Liao W, Guo X. Composite dietary antioxidant index is  
416 negatively associated with hyperuricemia in US adults: An analysis of NHANES 2007-2018. *Int J*  
417 *Endocrinol* (2023) 2023:6680229. doi: 10.1155/2023/6680229
- 418 12. Levey AS, Stevens LA, Schmid CH, Zhang YL, Castro AF 3rd, Feldman HI, et al. A new  
419 equation to estimate glomerular filtration rate. *Ann Intern Med* (2009) 150:604-12. doi:  
420 10.7326/0003-4819-150-9-200905050-00006
- 421 13. GWAS to the people. *Nat Med* (2018) 24:1483. doi: 10.1038/s41591-018-0231-3
- 422 14. Hayes B. Overview of statistical methods for genome-wide association studies (GWAS).  
423 *Methods Mol Biol* (2013) 1019:149-69. doi: 10.1007/978-1-62703-447-0\_6
- 424 15. Kuwabara M, Fukuuchi T, Aoki Y, Mizuta E, Ouchi M, Kurajoh M, et al. Exploring the  
425 multifaceted nexus of uric acid and health: A review of recent studies on diverse diseases.  
426 *Biomolecules* (2023) 13:1519. doi: 10.3390/biom13101519.
- 427 16. Kim S-K, Choe J-Y, Park K-Y. TXNIP-mediated nuclear factor- $\kappa$ B signaling pathway and  
428 intracellular shifting of TXNIP in uric acid-induced NLRP3 inflammasome. *Biochem Biophys Res*  
429 *Commun* (2019) 511:725-31. doi: 10.1016/j.bbrc.2019.02.141
- 430 17. Toyoda Y, Miyata H, Uchida N, Morimoto K, Shigesawa R, Kassai H, et al. Vitamin C  
431 transporter SVCT1 serves a physiological role as a urate importer: functional analyses and in vivo  
432 investigations. *Pflugers Arch* (2023) 475:489-504. doi: 10.1007/s00424-023-02792-1
- 433 18. So MW, Lim D-H, Kim S-H, Lee S. Dietary and nutritional factors associated with  
434 hyperuricemia: The seventh Korean National Health and Nutrition Examination Survey. *Asia Pac J*  
435 *Clin Nutr* (2020) 29:609-17. doi: 10.6133/apjcn.202009\_29(3).0021
- 436 19. Lyu L-C, Hsu C-Y, Yeh C-Y, Lee M-S, Huang S-H, Chen C-L. A case-control study of the  
437 association of diet and obesity with gout in Taiwan. *Am J Clin Nutr* (2003) 78:690-701. doi:  
438 10.1093/ajcn/78.4.690
- 439 20. Juraschek SP, Miller ER 3rd, Gelber AC. Effect of oral vitamin C supplementation on serum  
440 uric acid: a meta-analysis of randomized controlled trials. *Arthritis Care Res (Hoboken)* (2011)  
441 63:1295-306. doi: 10.1002/acr.20519
- 442 21. Abhishek A, Doherty M. Education and non-pharmacological approaches for gout.  
443 *Rheumatology (Oxford)* (2018) 57:i51-8. doi: 10.1093/rheumatology/kex421
- 444 22. Stamp LK, O'Donnell JL, Frampton C, Drake JM, Zhang M, Chapman PT. Clinically  
445 insignificant effect of supplemental vitamin C on serum urate in patients with gout: a pilot  
446 randomized controlled trial. *Arthritis Rheum* (2013) 65:1636-42. doi: 10.1002/art.37925
- 447 23. Linster CL, Van Schaftingen E. Vitamin C. Biosynthesis, recycling and degradation in  
448 mammals. *FEBS J* (2007) 274:1-22. doi: 10.1111/j.1742-4658.2006.05607.x
- 449 24. Padayatty SJ, Levine M. Vitamin C: the known and the unknown and Goldilocks. *Oral Dis*  
450 (2016) 22:463-93. doi: 10.1111/odi.12446
- 451 25. Li H, Liu X, Lee M-H, Li H. Vitamin C alleviates hyperuricemia nephropathy by reducing  
452 inflammation and fibrosis. *J Food Sci* (2021) 86:3265-76. doi: 10.1111/1750-3841.15803

453 26. Türker PF, Hoca M, Özduran G, Ok MA, Çelebi MD. The correlation of uric acid levels with  
454 biochemical parameters and dietary factors in individuals with asymptomatic hyperuricemia and  
455 gouty arthritis. *Nucleosides Nucleotides Nucleic Acids* (2022) 41:444-62. doi:  
456 10.1080/15257770.2022.2051047  
457

## 458 **References**

- 459 [1]N Dalbeth, Gosling A-L, Gaffo A, et al. Gout[J]. *Lancet*, 2021, 397(10287): 1843-1855.
- 460 [2]R Hansildaar, Vedder D, Baniaamam M, et al. Cardiovascular risk in inflammatory arthritis:  
461 rheumatoid arthritis and gout[J]. *Lancet Rheumatol*, 2021, 3(1): e58-e70.
- 462 [3]L Li, Zhang Y, Zeng C. Update on the epidemiology, genetics, and therapeutic options of  
463 hyperuricemia[J]. *Am J Transl Res*, 2020, 12(7): 3167-3181.
- 464 [4]S Safiri, Kolahi A-A, Cross M, et al. Prevalence, Deaths, and Disability-Adjusted Life Years  
465 Due to Musculoskeletal Disorders for 195 Countries and Territories 1990-2017[J]. *Arthritis*  
466 *Rheumatol*, 2021, 73(4): 702-714.
- 467 [5]P-V Chowalloor, Keen H-I. A systematic review of ultrasonography in gout and asymptomatic  
468 hyperuricaemia[J]. *Ann Rheum Dis*, 2013, 72(5): 638-645.
- 469 [6]I-D Karantas, Miliotou A-N, Siafaka P-I. An updated review for hyperuricemia and gout  
470 management; special focus on the available drug delivery systems and clinical trials[J]. *Curr Med*  
471 *Chem*, 2023.
- 472 [7]A Grzybowski, Pietrzak K. Albert Szent-Györgyi (1893-1986): the scientist who discovered  
473 vitamin C[J]. *Clin Dermatol*, 2013, 31(3): 327-331.
- 474 [8]O Brzezińska, Styrzyński F, Makowska J, et al. Role of Vitamin C in Prophylaxis and Treatment  
475 of Gout-A Literature Review[J]. *Nutrients*, 2021, 13(2).
- 476 [9]Y Sun, Sun J, Wang J, et al. Association between vitamin C intake and risk of hyperuricemia  
477 in US adults[J]. *Asia Pac J Clin Nutr*, 2018, 27(6): 1271-1276.
- 478 [10]Smith-G Davey, Hemani G. Mendelian randomization: genetic anchors for causal inference in  
479 epidemiological studies[J]. *Hum Mol Genet*, 2014, 23(R1): R89-R98.
- 480 [11]Z Lin, Chen H, Lan Q, et al. Composite Dietary Antioxidant Index Is Negatively Associated  
481 with Hyperuricemia in US Adults: An Analysis of NHANES 2007-2018[J]. *Int J Endocrinol*, 2023,  
482 20236680229.
- 483 [12]A-S Levey, Stevens L-A, Schmid C-H, et al. A new equation to estimate glomerular filtration  
484 rate[J]. *Ann Intern Med*, 2009, 150(9): 604-612.
- 485 [13]GWAS to the people[J]. *Nat Med*, 2018, 24(10): 1483.
- 486 [14]B Hayes. Overview of Statistical Methods for Genome-Wide Association Studies (GWAS)[J].  
487 *Methods Mol Biol*, 2013, 1019149-169.
- 488 [15]M Kuwabara, Fukuuchi T, Aoki Y, et al. Exploring the Multifaceted Nexus of Uric Acid and  
489 Health: A Review of Recent Studies on Diverse Diseases[J]. *Biomolecules*, 2023, 13(10).
- 490 [16]S-K Kim, Choe J-Y, Park K-Y. TXNIP-mediated nuclear factor- $\kappa$ B signaling pathway and  
491 intracellular shifting of TXNIP in uric acid-induced NLRP3 inflammasome[J]. *Biochem Biophys*  
492 *Res Commun*, 2019, 511(4): 725-731.
- 493 [17]Y Toyoda, Miyata H, Uchida N, et al. Vitamin C transporter SVCT1 serves a physiological role  
494 as a urate importer: functional analyses and in vivo investigations[J]. *Pflügers Arch*, 2023, 475(4):  
495 489-504.

- 496 [18]M-W So, Lim D-H, Kim S-H, et al. Dietary and nutritional factors associated with  
497 hyperuricemia: The seventh Korean National Health and Nutrition Examination Survey[J]. *Asia*  
498 *Pac J Clin Nutr*, 2020, 29(3): 609-617.
- 499 [19]L-C Lyu, Hsu C-Y, Yeh C-Y, et al. A case-control study of the association of diet and obesity  
500 with gout in Taiwan[J]. *Am J Clin Nutr*, 2003, 78(4): 690-701.
- 501 [20]S-P Juraschek, Miller ER-Rd, Gelber A-C. Effect of oral vitamin C supplementation on serum  
502 uric acid: a meta-analysis of randomized controlled trials[J]. *Arthritis Care Res (Hoboken)*, 2011,  
503 63(9): 1295-1306.
- 504 [21]A Abhishek, Doherty M. Education and non-pharmacological approaches for gout[J].  
505 *Rheumatology (Oxford)*, 2018, 57(suppl\_1): i51-i58.
- 506 [22]L-K Stamp, O'Donnell J-L, Frampton C, et al. Clinically insignificant effect of supplemental  
507 vitamin C on serum urate in patients with gout: a pilot randomized controlled trial[J]. *Arthritis*  
508 *Rheum*, 2013, 65(6): 1636-1642.
- 509 [23]C-L Linster, Van Schaftingen E. Vitamin C. Biosynthesis, recycling and degradation in  
510 mammals[J]. *FEBS J*, 2007, 274(1): 1-22.
- 511 [24]S-J Padayatty, Levine M. Vitamin C: the known and the unknown and Goldilocks[J]. *Oral Dis*,  
512 2016, 22(6): 463-493.
- 513 [25]H Li, Liu X, Lee M-H, et al. Vitamin C alleviates hyperuricemia nephropathy by reducing  
514 inflammation and fibrosis[J]. *J Food Sci*, 2021, 86(7): 3265-3276.
- 515 [26]P-F Türker, Hoca M, Özduran G, et al. The correlation of uric acid levels with biochemical  
516 parameters and dietary factors in individuals with asymptomatic hyperuricemia and gouty  
517 arthritis[J]. *Nucleosides Nucleotides Nucleic Acids*, 2022, 41(5-6): 444-462.

## 518 **11 Data Availability Statement**

519 The raw data supporting the conclusions of this article will be made available by the authors,  
520 without undue reservation.

## 521 **12 Figure Captions**

522

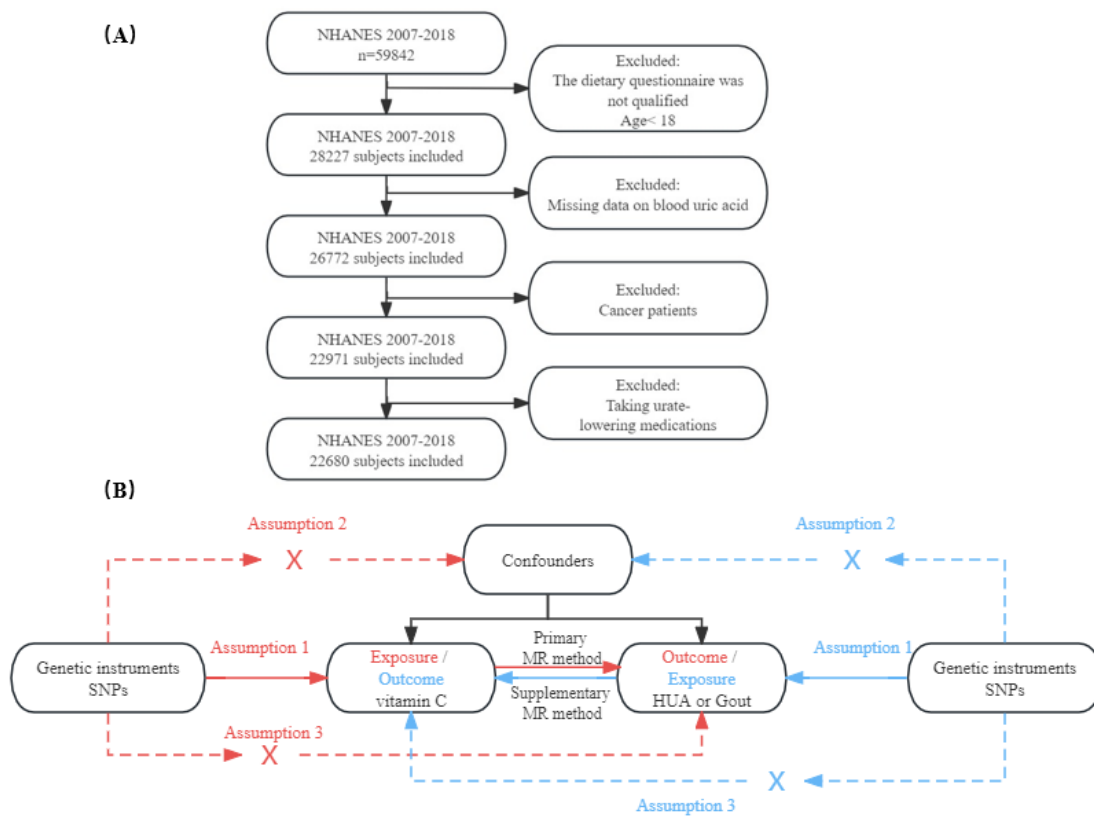

523  
524  
525  
526  
527

Figure 1. Study design overview

Note. (A) Flow chart of NHANES 2007-2018 sample selection, (B) General design of the MR Study.

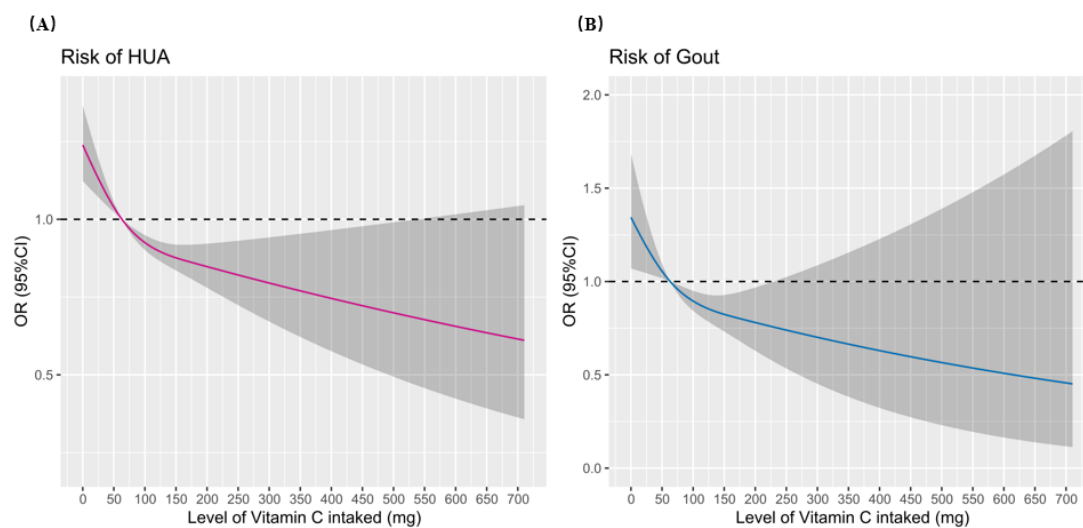

528  
529  
530  
531

Figure 2. Restricted cubic spline analysis of the association between VC intake and HUA or Gout

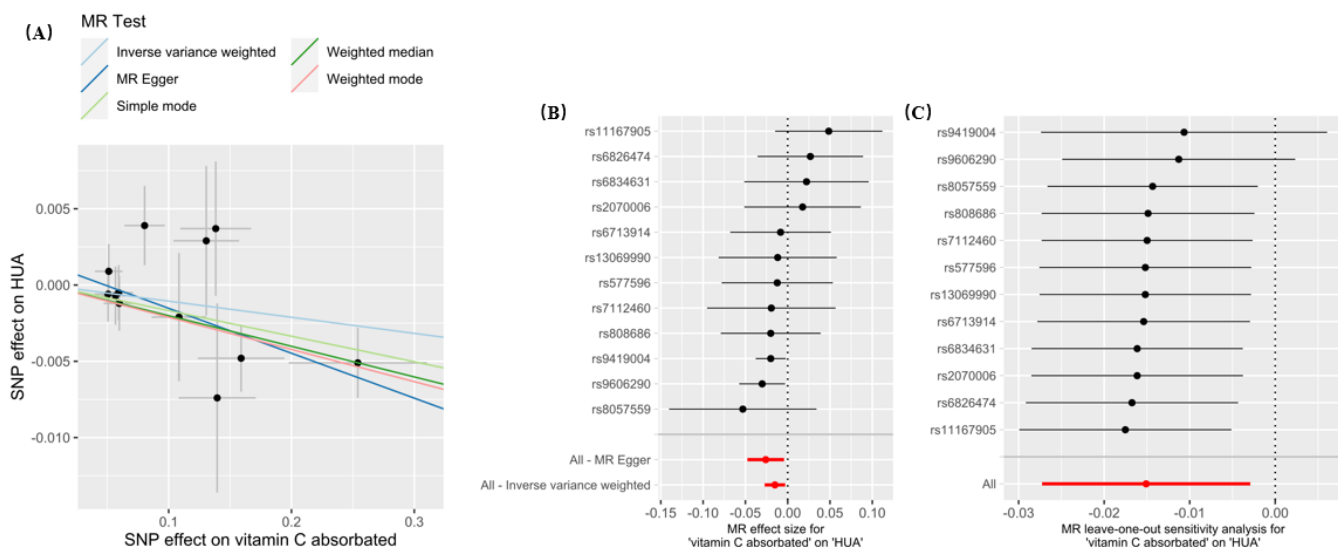

Figure 3. MR Effect of vitamin C absorbed on HUA

Note. (A) Scatter plot of SNP-HUA association versus SNP-vitamin C absorbed association; (B) Forest plots of vitamin C absorbed-HUA estimates for each SNP; (C) Leave-one-out sensitivity analysis.

532  
533  
534  
535  
536  
537

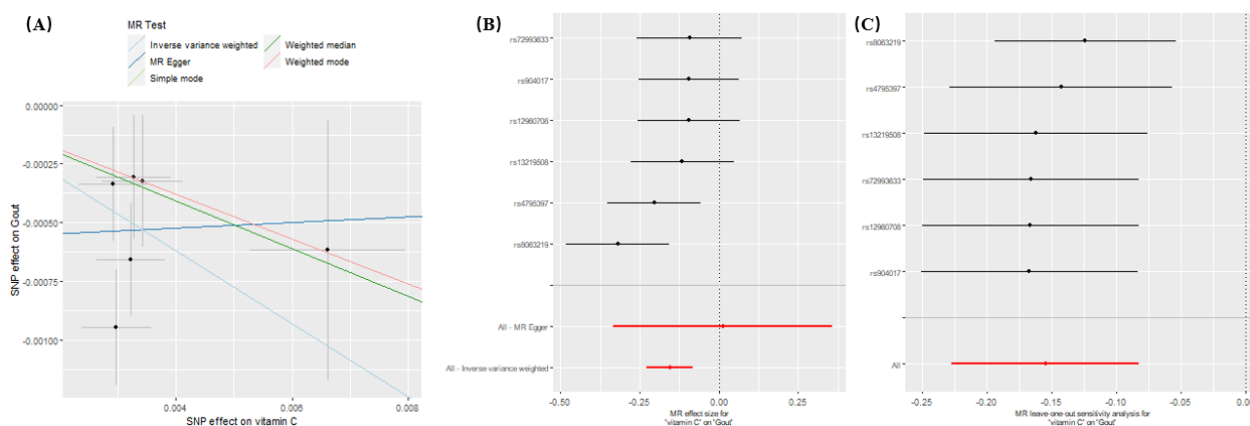

Figure 4. MR Effect of supplements: vitamin C on Gout

Note. (A) Scatter plot of SNP- Gout association versus SNP-vitamin C absorbed association; (B) Forest plots of vitamin C absorbed- Gout estimates for each SNP; (C) Leave-one-out sensitivity analysis.

538  
539  
540  
541

542 **13** Tables

543 **Table 1.** Basic characteristics of participants in the HUA study.

544

| Characteristic        | N           | Overall (N = 192,426,982) <sup>1</sup> | Non-HUA (N = 158,705,924) <sup>1</sup> | HUA (N = 33,721,057) <sup>1</sup> | P-value <sup>2</sup> |
|-----------------------|-------------|----------------------------------------|----------------------------------------|-----------------------------------|----------------------|
| Age (year)            | 192,426,982 | 45.64 ± 16.24                          | 45.00 ± 15.93                          | 48.68 ± 17.26                     | <0.001               |
| Gender, n (%)         | 192,426,982 |                                        |                                        |                                   | <0.001               |
| Male                  |             | 92,355,558 (48%)                       | 72,985,306 (46%)                       | 19,370,251 (57%)                  |                      |
| Female                |             | 100,071,424 (52%)                      | 85,720,618 (54%)                       | 14,350,806 (43%)                  |                      |
| Race, n (%)           | 192,426,982 |                                        |                                        |                                   | <0.001               |
| Hispanic              |             | 30,299,598 (16%)                       | 26,323,148 (17%)                       | 3,976,450 (12%)                   |                      |
| Non-Hispanic white    |             | 124,273,125 (65%)                      | 101,950,844 (64%)                      | 22,322,281 (66%)                  |                      |
| Non-Hispanic black    |             | 22,028,503 (11%)                       | 17,627,559 (11%)                       | 4,400,944 (13%)                   |                      |
| Other race            |             | 15,825,756 (8.2%)                      | 12,804,373 (8.1%)                      | 3,021,383 (9.0%)                  |                      |
| Marital status, n (%) | 192,384,707 |                                        |                                        |                                   | <0.001               |
| Married               |             | 108,477,283 (56%)                      | 90,330,620 (57%)                       | 18,146,663 (54%)                  |                      |



| Characteristic            | N           | Overall (N = 192,426,982) <sup>1</sup> | Non-HUA (N = 158,705,924) <sup>1</sup> | HUA (N = 33,721,057) <sup>1</sup> | P-value <sup>2</sup> |
|---------------------------|-------------|----------------------------------------|----------------------------------------|-----------------------------------|----------------------|
| Widowed                   |             | 8,788,789 (4.6%)                       | 6,439,793 (4.1%)                       | 2,348,996 (7.0%)                  |                      |
| Divorced                  |             | 19,257,962 (10%)                       | 15,335,326 (9.7%)                      | 3,922,636 (12%)                   |                      |
| Unmarried                 |             | 55,860,672 (29%)                       | 46,560,485 (29%)                       | 9,300,187 (28%)                   |                      |
| Education Level, n (%)    | 192,299,382 |                                        |                                        |                                   | <0.001               |
| Under high school         |             | 29,191,554 (15%)                       | 24,004,393 (15%)                       | 5,187,160 (15%)                   |                      |
| High school or equivalent |             | 44,813,137 (23%)                       | 35,924,420 (23%)                       | 8,888,717 (26%)                   |                      |
| College graduate or above |             | 118,294,691 (62%)                      | 98,659,627 (62%)                       | 19,635,063 (58%)                  |                      |
| Poverty level             | 179,552,555 | 2.97 ± 1.66                            | 2.98 ± 1.67                            | 2.91 ± 1.66                       | 0.2                  |
| Alcohol, n (%)            | 184,047,134 | 101,846,454 (55%)                      | 83,942,947 (55%)                       | 17,903,508 (55%)                  | 0.8                  |
| Smoker, n (%)             | 192,366,786 |                                        |                                        |                                   | <0.001               |
| Never                     |             | 110,972,136 (58%)                      | 92,650,182 (58%)                       | 18,321,954 (54%)                  |                      |
| Former                    |             | 44,255,187 (23%)                       | 34,632,423 (22%)                       | 9,622,764 (29%)                   |                      |
| Now                       |             | 37,139,463 (19%)                       | 31,369,386 (20%)                       | 5,770,077 (17%)                   |                      |

| Characteristic         | N           | Overall (N = 192,426,982) <sup>1</sup> | Non-HUA (N = 158,705,924) <sup>1</sup> | HUA (N = 33,721,057) <sup>1</sup> | P-value <sup>2</sup> |
|------------------------|-------------|----------------------------------------|----------------------------------------|-----------------------------------|----------------------|
| BMI                    | 191,205,305 | 29.12 ± 6.91                           | 28.37 ± 6.51                           | 32.71 ± 7.59                      | <0.001               |
| Waist (cm)             | 188,150,185 | 99.09 ± 16.51                          | 97.16 ± 15.81                          | 108.32 ± 16.66                    | <0.001               |
| Gout, n (%)            | 192,426,982 |                                        |                                        |                                   | <0.001               |
| Non-gout               |             | 187,295,003 (97%)                      | 156,242,184 (NA%)                      | 31,052,819 (NA%)                  |                      |
| Gout                   |             | 5,131,979 (2.7%)                       | 2,463,740 (NA%)                        | 2,668,239 (NA%)                   |                      |
| CVD, n (%)             | 192,426,982 | 13,776,816 (7.2%)                      | 9,868,586 (6.2%)                       | 3,908,230 (12%)                   | <0.001               |
| Hypertension, n (%)    | 192,426,982 | 55,851,108 (29%)                       | 40,155,992 (25%)                       | 15,695,116 (47%)                  | <0.001               |
| Hyperlipidaemia, n (%) | 174,166,347 | 59,000,325 (34%)                       | 46,126,903 (32%)                       | 12,873,423 (42%)                  | <0.001               |
| Diabetes, n (%)        | 192,426,982 | 16,810,847 (8.7%)                      | 12,361,248 (7.8%)                      | 4,449,599 (13%)                   | <0.001               |
| Nephrolithiasis, n (%) | 192,426,982 | 17,329,578 (9.0%)                      | 13,753,952 (8.7%)                      | 3,575,625 (11%)                   | 0.006                |
| Creatinine (µmol/L)    | 192,424,374 | 77.26 ± 29.87                          | 74.87 ± 27.76                          | 88.51 ± 36.22                     | <0.001               |
| Serum glucose (mmol/L) | 192,426,982 | 5.48 ± 1.84                            | 5.43 ± 1.84                            | 5.72 ± 1.80                       | <0.001               |
| eGFR                   | 192,424,374 | 96.24 ± 21.52                          | 98.38 ± 20.33                          | 86.18 ± 23.96                     | <0.001               |

| Characteristic                  | N           | Overall (N = 192,426,982) <sup>1</sup> | Non-HUA (N = 158,705,924) <sup>1</sup> | HUA (N = 33,721,057) <sup>1</sup> | P-value <sup>2</sup> |
|---------------------------------|-------------|----------------------------------------|----------------------------------------|-----------------------------------|----------------------|
| Cholesterol (mmol/L)            | 192,426,982 | 5.04 ± 1.07                            | 5.01 ± 1.06                            | 5.17 ± 1.12                       | <0.001               |
| Triglyceride (mmol/L)           | 192,358,986 | 1.74 ± 1.44                            | 1.65 ± 1.37                            | 2.17 ± 1.67                       | <0.001               |
| Direct HDL cholesterol (mmol/L) | 192,401,422 | 1.38 ± 0.42                            | 1.40 ± 0.42                            | 1.26 ± 0.39                       | <0.001               |
| Uric Acid (umol/L)              | 192,426,982 | 322.51 ± 83.91                         | 296.25 ± 62.36                         | 446.10 ± 57.95                    | <0.001               |
| Vitamin_C (mg)                  | 192,426,982 | 81.47 ± 74.24                          | 82.93 ± 74.95                          | 74.61 ± 70.36                     | <0.001               |
| VCQ, n (%)                      | 192,426,982 |                                        |                                        |                                   | <0.001               |
| Q1                              |             | 48,001,038 (25%)                       | 38,120,210 (24%)                       | 9,880,829 (29%)                   |                      |
| Q2                              |             | 48,269,722 (25%)                       | 40,021,703 (25%)                       | 8,248,019 (24%)                   |                      |
| Q3                              |             | 48,115,700 (25%)                       | 39,684,899 (25%)                       | 8,430,801 (25%)                   |                      |
| Q4                              |             | 48,040,521 (25%)                       | 40,879,112 (26%)                       | 7,161,409 (21%)                   |                      |

545 <sup>1</sup>Mean ± SD or n (%)

546 <sup>2</sup>Wilcoxon rank-sum test for complex survey samples; chi-squared test with Rao & Scott's second-order correction

547 Abbreviations: eGFR, glomerular filtration rate; HUA, hyperuricemia

548

549 **Table 2.** Basic characteristics of participants in the gout study.

550

| Characteristic     | N           | Overall (N = 192,426,982) <sup>1</sup> | Non-gout (N = 187,295,003) <sup>1</sup> | Gout (N = 5,131,979) <sup>1</sup> | P-value <sup>2</sup> |
|--------------------|-------------|----------------------------------------|-----------------------------------------|-----------------------------------|----------------------|
| Age (year)         | 192,426,982 | 45.64 ± 16.24                          | 45.32 ± 16.19                           | 57.55 ± 12.94                     | <0.001               |
| Gender, n (%)      | 192,426,982 |                                        |                                         |                                   | <0.001               |
| Male               |             | 92,355,558 (48.0%)                     | 88,878,925 (47.5%)                      | 3,476,633 (67.7%)                 |                      |
| Female             |             | 100,071,424 (52.0%)                    | 98,416,078 (52.5%)                      | 1,655,346 (32.3%)                 |                      |
| Race, n (%)        | 192,426,982 |                                        |                                         |                                   | 0.014                |
| Hispanic           |             | 30,299,598 (15.7%)                     | 29,834,570 (15.9%)                      | 465,027 (9.1%)                    |                      |
| Non-Hispanic white |             | 124,273,125 (64.6%)                    | 120,723,187 (64.5%)                     | 3,549,938 (69.2%)                 |                      |
| Non-Hispanic black |             | 22,028,503 (11.4%)                     | 21,380,418 (11.4%)                      | 648,085 (12.6%)                   |                      |
| Other race         |             | 15,825,756 (8.2%)                      | 15,356,828 (8.2%)                       | 468,928 (9.1%)                    |                      |
| Marital status     | 192,384,707 |                                        |                                         |                                   | <0.001               |
| Married            |             | 108,477,283 (56.4%)                    | 105,141,701 (56.1%)                     | 3,335,582 (65.0%)                 |                      |
| Widowed            |             | 8,788,789 (4.6%)                       | 8,457,078 (4.5%)                        | 331,711 (6.5%)                    |                      |

| Characteristic            | N           | Overall (N = 192,426,982) <sup>1</sup> | Non-gout (N = 187,295,003) <sup>1</sup> | Gout (N = 5,131,979) <sup>1</sup> | P-value <sup>2</sup> |
|---------------------------|-------------|----------------------------------------|-----------------------------------------|-----------------------------------|----------------------|
| Divorced                  |             | 19,257,962 (10.0%)                     | 18,523,213 (9.9%)                       | 734,749 (14.3%)                   |                      |
| Unmarried                 |             | 55,860,672 (29.0%)                     | 55,133,311 (29.4%)                      | 727,361 (14.2%)                   |                      |
| Education Level, n (%)    | 192,299,382 |                                        |                                         |                                   | 0.4                  |
| Under high school         |             | 29,191,554 (15.2%)                     | 28,298,957 (15.1%)                      | 892,597 (17.4%)                   |                      |
| High school or equivalent |             | 44,813,137 (23.3%)                     | 43,579,805 (23.3%)                      | 1,233,333 (24.0%)                 |                      |
| College graduate or above |             | 118,294,691 (61.5%)                    | 115,288,641 (61.6%)                     | 3,006,049 (58.6%)                 |                      |
| Poverty level             | 179,552,555 | 2.97 ± 1.66                            | 2.97 ± 1.66                             | 2.88 ± 1.68                       | 0.4                  |
| Alcohol, n (%)            | 184,047,134 | 101,846,454 (55.3%)                    | 99,515,325 (55.6%)                      | 2,331,129 (46.8%)                 | 0.006                |
| Smoker, n (%)             | 192,366,786 |                                        |                                         |                                   | <0.001               |
| Never                     |             | 110,972,136 (57.7%)                    | 108,756,367 (58.1%)                     | 2,215,769 (43.2%)                 |                      |
| Former                    |             | 44,255,187 (23.0%)                     | 42,344,158 (22.6%)                      | 1,911,029 (37.2%)                 |                      |
| Now                       |             | 37,139,463 (19.3%)                     | 36,134,283 (19.3%)                      | 1,005,180 (19.6%)                 |                      |
| BMI                       | 191,205,305 | 29.12 ± 6.91                           | 29.03 ± 6.86                            | 32.61 ± 7.87                      | <0.001               |

| Characteristic         | N           | Overall (N = 192,426,982) <sup>1</sup> | Non-gout (N = 187,295,003) <sup>1</sup> | Gout (N = 5,131,979) <sup>1</sup> | P-value <sup>2</sup> |
|------------------------|-------------|----------------------------------------|-----------------------------------------|-----------------------------------|----------------------|
| Waist (cm)             | 188,150,185 | 99.09 ± 16.51                          | 98.79 ± 16.38                           | 110.21 ± 17.41                    | <0.001               |
| CVD, n (%)             | 192,426,982 | 13,776,816 (7.2%)                      | 12,511,132 (6.7%)                       | 1,265,684 (24.7%)                 | <0.001               |
| Hypertension, n (%)    | 192,426,982 | 55,851,108 (29.0%)                     | 52,645,056 (28.1%)                      | 3,206,052 (62.5%)                 | <0.001               |
| Hyperlipidaemia, n (%) | 174,166,347 | 59,000,325 (33.9%)                     | 56,265,750 (33.2%)                      | 2,734,576 (55.4%)                 | <0.001               |
| Diabetes, n (%)        | 192,426,982 | 16,810,847 (8.7%)                      | 15,648,533 (8.4%)                       | 1,162,314 (22.6%)                 | <0.001               |
| Nephrolithiasis, n (%) | 192,426,982 | 17,329,578 (9.0%)                      | 16,557,608 (8.8%)                       | 771,969 (15.0%)                   | <0.001               |
| HUA, n (%)             | 192,426,982 |                                        |                                         |                                   | <0.001               |
| Non-HUA                |             | 158,705,924 (82.5%)                    | 156,242,184 (NA%)                       | 2,463,740 (NA%)                   |                      |
| HUA                    |             | 33,721,057 (17.5%)                     | 31,052,819 (NA%)                        | 2,668,239 (NA%)                   |                      |
| Creatinine (µmol/L)    | 192,424,374 | 77.26 ± 29.87                          | 76.69 ± 26.26                           | 97.89 ± 88.64                     | <0.001               |
| Serum glucose (mmol/L) | 192,426,982 | 5.48 ± 1.84                            | 5.45 ± 1.80                             | 6.43 ± 2.86                       | <0.001               |
| eGFR                   | 192,424,374 | 96.24 ± 21.52                          | 96.70 ± 21.32                           | 79.37 ± 22.03                     | <0.001               |
| Cholesterol (mmol/L)   | 192,426,982 | 5.04 ± 1.07                            | 5.03 ± 1.07                             | 5.07 ± 1.18                       | 0.6                  |

| Characteristic                  | N           | Overall (N = 192,426,982) <sup>1</sup> | Non-gout (N = 187,295,003) <sup>1</sup> | Gout (N = 5,131,979) <sup>1</sup> | P-value <sup>2</sup> |
|---------------------------------|-------------|----------------------------------------|-----------------------------------------|-----------------------------------|----------------------|
| Triglyceride (mmol/L)           | 192,358,986 | 1.74 ± 1.44                            | 1.72 ± 1.42                             | 2.35 ± 1.90                       | <0.001               |
| Direct HDL cholesterol (mmol/L) | 192,401,422 | 1.38 ± 0.42                            | 1.38 ± 0.42                             | 1.23 ± 0.39                       | <0.001               |
| Uric Acid (umol/L)              | 192,426,982 | 322.51 ± 83.91                         | 320.02 ± 81.89                          | 413.28 ± 103.94                   | <0.001               |
| Vitamin_C (mg)                  | 192,426,982 | 81.47 ± 74.24                          | 81.81 ± 74.50                           | 69.12 ± 62.74                     | 0.003                |
| VCQ, n (%)                      | 192,426,982 |                                        |                                         |                                   | 0.2                  |
| Q1                              |             | 48,001,038 (24.9%)                     | 46,523,048 (24.8%)                      | 1,477,991 (28.8%)                 |                      |
| Q2                              |             | 48,269,722 (25.1%)                     | 46,800,328 (25.0%)                      | 1,469,394 (28.6%)                 |                      |
| Q3                              |             | 48,115,700 (25.0%)                     | 46,929,892 (25.1%)                      | 1,185,808 (23.1%)                 |                      |
| Q4                              |             | 48,040,521 (25.0%)                     | 47,041,735 (25.1%)                      | 998,786 (19.5%)                   |                      |

551 <sup>1</sup>Mean ± SD or n (%)

552 <sup>2</sup>Wilcoxon rank-sum test for complex survey samples; chi-squared test with Rao & Scott's second-order correction

553 Abbreviations: eGFR, glomerular filtration rate; HUA, hyperuricemia

554  
555

**Table 3.** Association between dietary vitamin C levels (quartiles) and HUA or gout.

| Disease | Vitamin C |             |    |                  |                  |                  | P-value for trend |
|---------|-----------|-------------|----|------------------|------------------|------------------|-------------------|
|         | Q1        | Q2          | Q3 | Q4               |                  |                  |                   |
| HUA     | Model 1   | OR (95% CI) | —  | 0.80 (0.70–0.91) | 0.82 (0.72–0.94) | 0.68 (0.59–0.78) | <0.001            |
|         |           | P-value     | —  | 0.001            | 0.005            | <0.001           |                   |
|         | Model 2   | OR (95% CI) | —  | 0.78 (0.68–0.89) | 0.81 (0.70–0.93) | 0.65 (0.56–0.76) |                   |
|         |           | P-value     | —  | <0.001           | 0.004            | <0.001           |                   |
|         | Model 3   | OR (95% CI) | —  | 0.81 (0.68–0.96) | 0.90 (0.76–1.06) | 0.78 (0.65–0.93) |                   |
|         |           | P-value     | —  | 0.014            | 0.2              | 0.007            |                   |
| Gout    | Model 1   | OR (95% CI) | —  | 0.99 (0.64–1.52) | 0.80 (0.53–1.20) | 0.67 (0.46–0.97) | <0.05             |
|         |           | P-value     | —  | >0.9             | 0.3              | 0.034            |                   |
|         | Model 2   | OR (95% CI) | —  | 0.98 (0.63–1.53) | 0.74 (0.47–1.16) | 0.63 (0.42–0.94) |                   |
|         |           | P-value     | —  | >0.9             | 0.2              | 0.025            |                   |
|         | Model 3   | OR (95% CI) | —  | 1.03 (0.65–1.63) | 0.83 (0.52–1.34) | 0.77 (0.50–1.20) |                   |
|         |           | P-value     | —  | 0.9              | 0.4              | 0.3              |                   |

556 Abbreviations: HUA, hyperuricemia



557  
558

**Table 4.** MR results for the causal effect of vitamin C on HUA and gout.

| Outcome | Exposure               | Method                    | nSNP | $\beta$ | SE    | OR (95% CI)                 | P-value |
|---------|------------------------|---------------------------|------|---------|-------|-----------------------------|---------|
| HUA     | Vitamin C absorbed     | MR-Egger                  | 12   | -0.026  | 0.011 | 0.974 (0.953–0.996)         | 0.041   |
|         |                        | Weighted median           | 12   | -0.020  | 0.009 | 0.980 (0.963–0.998)         | 0.025   |
|         |                        | Inverse variance weighted | 12   | -0.015  | 0.006 | 0.985 (0.973–0.997)         | 0.015   |
|         |                        | Simple mode               | 12   | -0.017  | 0.016 | 0.983 (0.954–1.014)         | 0.313   |
|         |                        | Weighted mode             | 12   | -0.021  | 0.009 | 0.979 (0.962–0.997)         | 0.044   |
| HUA     | Supplements: vitamin C | MR-Egger                  | 5    | 3.443   | 2.730 | 31.271 (0.148–6,589.606)    | 0.296   |
|         |                        | Weighted median           | 5    | 0.045   | 0.402 | 1.046 (0.475–2.301)         | 0.911   |
|         |                        | Inverse variance weighted | 5    | -0.219  | 0.629 | 0.803 (0.234–2.755)         | 0.728   |
|         |                        | Simple mode               | 5    | 0.468   | 0.478 | 1.597 (0.626–4.077)         | 0.383   |
|         |                        | Weighted mode             | 5    | 0.299   | 0.489 | 1.349 (0.518–3.514)         | 0.574   |
| HUA     | Medication: vitamin C  | MR-Egger                  | 4    | 5.387   | 3.805 | 218.551 (0.126–378,799.561) | 0.293   |
|         |                        | Weighted median           | 4    | -1.047  | 1.044 | 0.351 (0.045–2.715)         | 0.316   |
|         |                        | Inverse variance weighted | 4    | -1.549  | 1.149 | 0.213 (0.022–2.022)         | 0.178   |
|         |                        | Simple mode               | 4    | -0.871  | 1.400 | 0.418 (0.027–6.507)         | 0.578   |
|         |                        | Weighted mode             | 4    | -0.829  | 1.342 | 0.437 (0.031–6.053)         | 0.580   |
| Gout    | Vitamin C absorbed     | MR-Egger                  | 13   | 0.000   | 0.001 | 1.000 (0.998–1.003)         | 0.815   |
|         |                        | Weighted median           | 13   | 0.001   | 0.001 | 1.001 (0.999–1.002)         | 0.601   |
|         |                        | Inverse variance weighted | 13   | 0.001   | 0.001 | 1.001 (0.999–1.002)         | 0.451   |
|         |                        | Simple mode               | 13   | 0.000   | 0.002 | 1.000 (0.997–1.004)         | 0.822   |
|         |                        | Weighted mode             | 13   | 0.000   | 0.001 | 1.000 (0.999–1.002)         | 0.686   |
| Gout    | Supplements: vitamin C | MR-Egger                  | 6    | 0.012   | 0.177 | 1.012 (0.716–1.431)         | 0.949   |
|         |                        | Weighted median           | 6    | -0.101  | 0.046 | 0.904 (0.827–0.988)         | 0.026   |
|         |                        | Inverse variance weighted | 6    | -0.155  | 0.037 | 0.857 (0.797–0.921)         | 0.000   |
|         |                        | Simple mode               | 6    | -0.095  | 0.065 | 0.909 (0.800–1.034)         | 0.207   |
|         |                        | Weighted mode             | 6    | -0.095  | 0.062 | 0.909 (0.806–1.026)         | 0.185   |
| Gout    | Medication: vitamin C  | MR-Egger                  | 4    | -0.073  | 0.468 | 0.930 (0.372–2.327)         | 0.891   |

---

C

|                           |   |        |       |                     |       |
|---------------------------|---|--------|-------|---------------------|-------|
| Weighted median           | 4 | -0.014 | 0.118 | 0.986 (0.782–1.244) | 0.908 |
| Inverse variance weighted | 4 | 0.020  | 0.102 | 1.020 (0.835–1.247) | 0.845 |
| Simple mode               | 4 | -0.090 | 0.171 | 0.914 (0.654–1.278) | 0.637 |
| Weighted mode             | 4 | -0.088 | 0.188 | 0.916 (0.633–1.325) | 0.673 |

---

559 Abbreviations: HUA, hyperuricemia; MR, Mendelian randomisation

560 **Table 5.** Sensitivity analysis between vitamin C and HUA and gout.

561

| Outcome | Exposure               | Method                | Cochran's Q test |      |         | MR-Egger intercept test |                       |         |
|---------|------------------------|-----------------------|------------------|------|---------|-------------------------|-----------------------|---------|
|         |                        |                       | Q                | Q_df | P-value | Intercept               | SE                    | P-value |
| HUA     | Vitamin absorbed       | <sup>C</sup> MR-Egger | 19.749           | 11   | 0.049   | 0.002                   | 0.002                 | 0.153   |
|         | Supplements: vitamin C | MR-Egger              | 12.779           | 3    | 0.005   | -0.013                  | 0.009                 | 0.264   |
|         | Medication: vitamin C  | MR-Egger              | 2.539            | 2    | 0.281   | -0.011                  | 0.006                 | 0.202   |
| Gout    | Vitamin absorbed       | <sup>C</sup> MR-Egger | 4.343            | 11   | 0.959   | $3.33 \times 10^{-5}$   | $1.50 \times 10^{-4}$ | 0.829   |
|         | Supplements: vitamin C | MR-Egger              | 5.076            | 4    | 0.280   | $-5.71 \times 10^{-4}$  | $5.92 \times 10^{-4}$ | 0.389   |
|         | Medication: vitamin C  | MR-Egger              | 1.778            | 2    | 0.411   | $1.50 \times 10^{-4}$   | $7.38 \times 10^{-4}$ | 0.858   |

562 Abbreviations: HUA, hyperuricemia; MR, Mendelian randomisation

563  
564

**Table 6.** Results for the causal effect of vitamin C on HUA and gout.

| Outcome                | Exposure | Method                    | nSNP | $\beta$ | SE    | OR (95% CI)           | P-value |
|------------------------|----------|---------------------------|------|---------|-------|-----------------------|---------|
| Vitamin absorbed       | C HUA    | MR-Egger                  | 102  | -0.082  | 0.073 | 0.922 (0.798–1.064)   | 0.268   |
|                        |          | Weighted median           | 102  | -0.057  | 0.077 | 0.945 (0.812–1.098)   | 0.459   |
|                        |          | Inverse variance weighted | 102  | -0.050  | 0.049 | 0.951 (0.864–1.048)   | 0.311   |
|                        |          | Simple mode               | 102  | -0.102  | 0.163 | 0.903 (0.656–1.242)   | 0.532   |
|                        |          | Weighted mode             | 102  | -0.076  | 0.068 | 0.927 (0.811–1.059)   | 0.269   |
| Supplements: vitamin C | HUA      | MR-Egger                  | 338  | 0.000   | 0.002 | 1.000 (0.995–1.004)   | 0.949   |
|                        |          | Weighted median           | 338  | 0.001   | 0.003 | 1.001 (0.996–1.006)   | 0.704   |
|                        |          | Inverse variance weighted | 338  | -0.004  | 0.002 | 0.996 (0.992–0.999)   | 0.013   |
|                        |          | Simple mode               | 338  | -0.004  | 0.009 | 0.996 (0.979–1.012)   | 0.604   |
|                        |          | Weighted mode             | 338  | 0.000   | 0.002 | 1.000 (0.995–1.005)   | 0.981   |
| Medication: vitamin C  | HUA      | MR-Egger                  | 261  | 0.003   | 0.002 | 1.003 (1.000–1.006)   | 0.044   |
|                        |          | Weighted median           | 261  | 0.003   | 0.001 | 1.003 (1.001–1.006)   | 0.016   |
|                        |          | Inverse variance weighted | 261  | 0.000   | 0.001 | 1.000 (0.998–1.002)   | 0.848   |
|                        |          | Simple mode               | 261  | -0.009  | 0.004 | 0.991 (0.983–0.999)   | 0.033   |
|                        |          | Weighted mode             | 261  | 0.002   | 0.001 | 1.002 (1.000–1.005)   | 0.071   |
| Vitamin absorbed       | C Gout   | MR-Egger                  | 5    | -1.844  | 1.723 | 0.158 (0.005–4.638)   | 0.363   |
|                        |          | Weighted median           | 5    | -1.545  | 1.222 | 0.213 (0.019–2.340)   | 0.206   |
|                        |          | Inverse variance weighted | 5    | -1.378  | 1.195 | 0.252 (0.024–2.626)   | 0.249   |
|                        |          | Simple mode               | 5    | -0.999  | 2.919 | 0.368 (0.001–112.413) | 0.749   |
|                        |          | Weighted mode             | 5    | -1.577  | 1.247 | 0.207 (0.018–2.378)   | 0.275   |
| Supplements: vitamin C | Gout     | MR-Egger                  | 12   | -0.624  | 0.560 | 0.536 (0.179–1.606)   | 0.291   |
|                        |          | Weighted median           | 12   | -0.195  | 0.177 | 0.823 (0.582–1.163)   | 0.269   |
|                        |          | Inverse variance weighted | 12   | -0.195  | 0.170 | 0.823 (0.589–1.149)   | 0.252   |
|                        |          | Simple mode               | 12   | -0.157  | 0.236 | 0.854 (0.538–1.358)   | 0.519   |

|                          |      |                           |    |        |       |                     |       |
|--------------------------|------|---------------------------|----|--------|-------|---------------------|-------|
| Medication:<br>vitamin C | Gout | Weighted mode             | 12 | -0.137 | 0.226 | 0.872 (0.560–1.358) | 0.556 |
|                          |      | MR-Egger                  | 10 | -0.497 | 0.430 | 0.609 (0.262–1.415) | 0.282 |
|                          |      | Weighted median           | 10 | -0.033 | 0.077 | 0.968 (0.833–1.125) | 0.668 |
|                          |      | Inverse variance weighted | 10 | 0.019  | 0.076 | 1.020 (0.878–1.183) | 0.799 |
|                          |      | Simple mode               | 10 | -0.122 | 0.132 | 0.885 (0.683–1.147) | 0.380 |
|                          |      | Weighted mode             | 10 | -0.122 | 0.141 | 0.885 (0.671–1.167) | 0.409 |

565 Abbreviations: HUA, hyperuricemia; MR, Mendelian randomisation

566

567 **Table 7.** Sensitivity analysis between vitamin C and HUA and gout.

568

| Outcome                   | Exposure  | Method   | Cochran's Q test |      |         | MR-Egger intercept test |                       |         |
|---------------------------|-----------|----------|------------------|------|---------|-------------------------|-----------------------|---------|
|                           |           |          | Q                | Q df | P-value | Intercept               | SE                    | P-value |
| Vitamin absorbed          | C<br>HUA  | MR-Egger | 15.422           | 100  | 1.000   | $1.13 \times 10^{-3}$   | 0.002                 | 0.560   |
| Supplements:<br>vitamin C |           | MR-Egger | 392.890          | 336  | 0.018   | $-1.62 \times 10^{-4}$  | $6.15 \times 10^{-5}$ | 0.009   |
| Medication:<br>vitamin C  |           | MR-Egger | 298.481          | 259  | 0.046   | $-7.30 \times 10^{-5}$  | $3.12 \times 10^{-5}$ | 0.020   |
| Vitamin absorbed          | C<br>Gout | MR-Egger | 0.386            | 3    | 0.943   | 0.004                   | 0.011                 | 0.732   |
| Supplements:<br>vitamin C |           | MR-Egger | 19.467           | 10   | 0.035   | $7.59 \times 10^{-4}$   | $9.43 \times 10^{-4}$ | 0.440   |
| Medication:<br>vitamin C  |           | MR-Egger | 15.426           | 8    | 0.051   | $8.18 \times 10^{-4}$   | $6.72 \times 10^{-4}$ | 0.258   |

569 Abbreviations: HUA, hyperuricemia; MR, Mendelian randomisation
